# Supplementary material for: MicroRNAs dysregulated in multiple sclerosis affect the differentiation of CG-4 cells, an oligodendrocyte progenitor cell line
Source: PubMed Central journal article supplement (PMC10937391; doi:10.3389/fncel.2024.1336439), 2024-02-29
Supplement: Data_Sheet_1.pdf [file Data_Sheet_1.pdf]

*Supplementary Material*

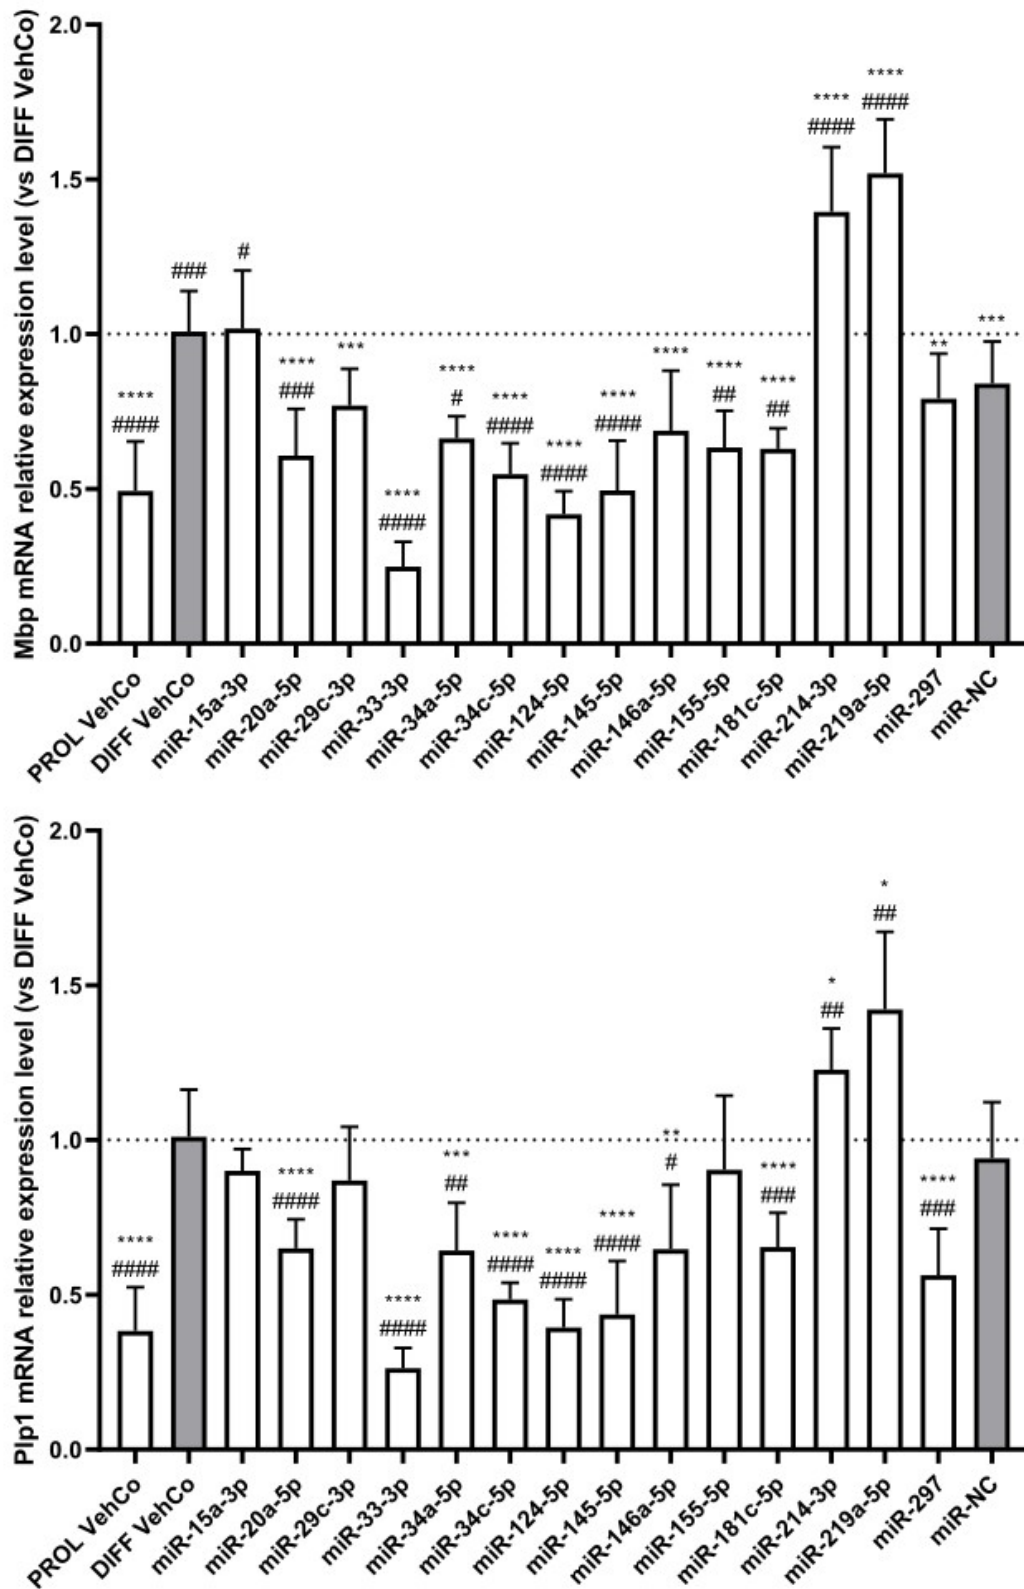

**Supplementary figure 1:** The effect of 13 microRNA mimics on the differentiation of CG-4 cells in RT-qPCR (screening). The plots show the relative expression (mean with SD of  $2^{-\Delta\Delta C_t}$ ) of the differentiation markers *Mbp* and *Plp1* to the differentiation vehicle control (DIFF VehCo)

resulting from the double transfection of each microRNA mimic (as labelled on the *x*-axis) in CG-4 cells in differentiation culture conditions, as well as the proliferation vehicle control (PROL VehCo). The dotted line represents the mean relative expression of the differentiation vehicle control to which the relative expression ( $2^{-\Delta\Delta C_t}$ ) of each sample was calculated. The adjusted *p*-value was calculated by Dunnett's multiple comparison test to each control separately (gray bars), i.e. the differentiation vehicle control (\*) and the microRNA mimic negative control (miR-NC, #), as recommended following a parametric one-way ANOVA on all conditions: ns for non-significant, \*/# for  $p \leq 0.05$ , \*\*/## for  $p \leq 0.01$ , \*\*\*/### for  $p \leq 0.001$ , \*\*\*\*/#### for  $p \leq 0.0001$ . Data of 3 experiments for each microRNA with each condition in triplicate. SD, standard deviation.

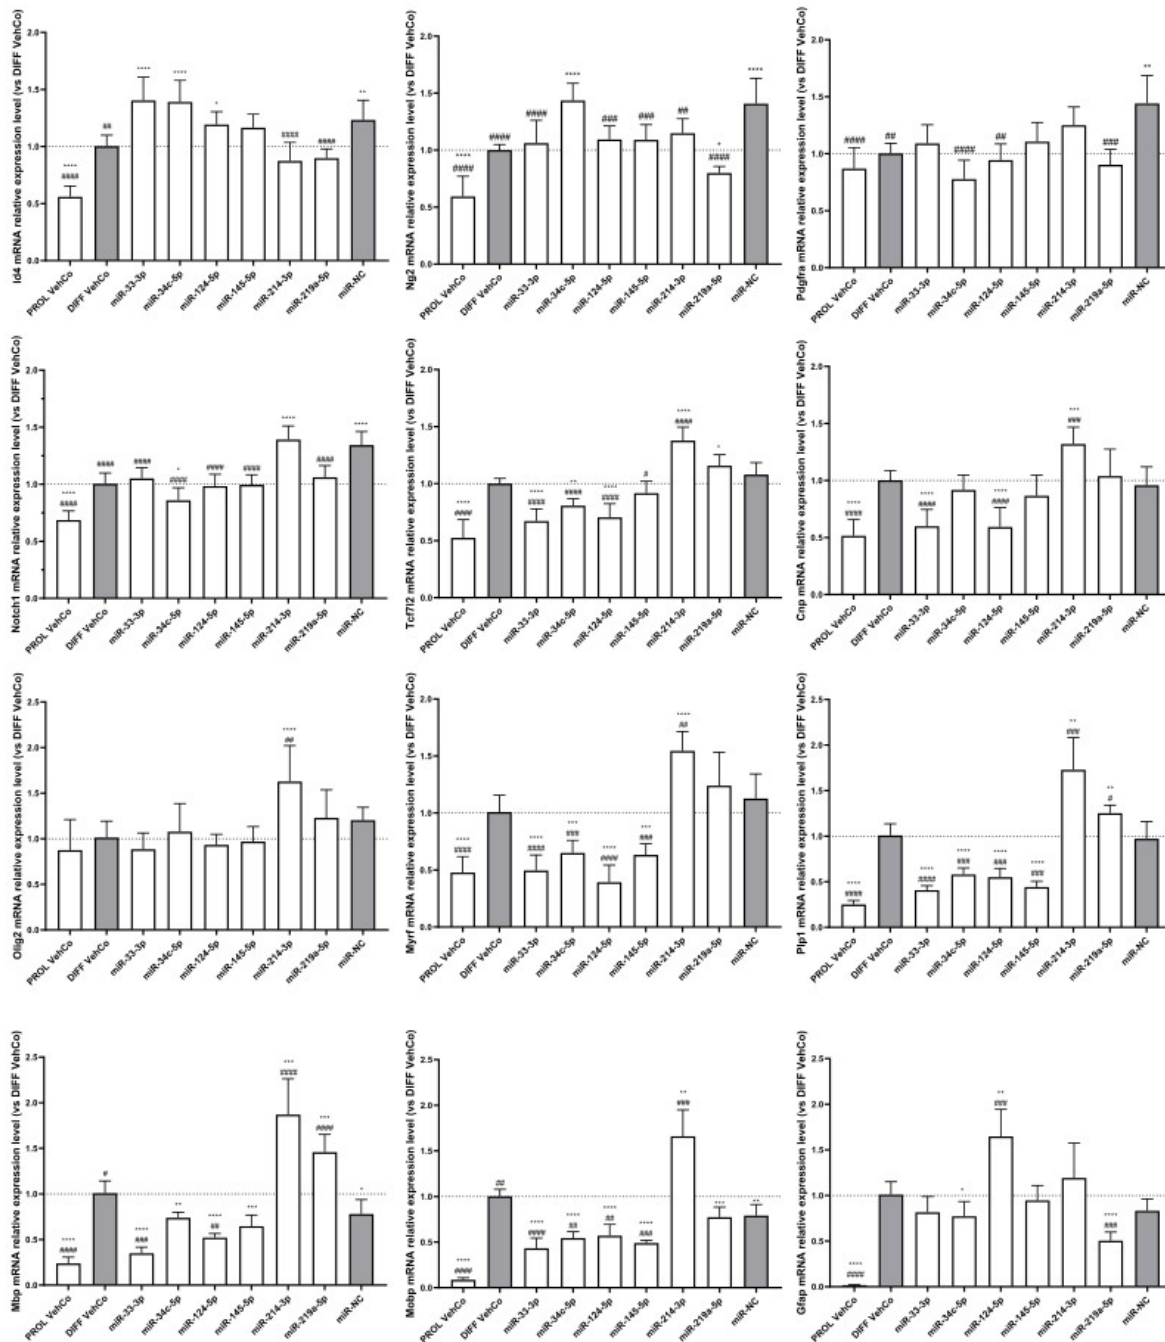

**Supplementary figure 2:** The effect of 5 microRNA mimics on the differentiation of CG-4 cells in RT-qPCR (confirmation). The plots show the relative expression (mean with SD of  $2^{-\Delta\Delta Ct}$ ) of several OPC, pre-OL, OL and astrocyte markers to the differentiation vehicle control (DIFF VehCo) resulting from the single transfection of each microRNA mimic (as labelled on the x-axis) in CG-4 cells in differentiation culture conditions, as well as the proliferation vehicle control (PROL VehCo). The dotted line represents the mean relative expression of the differentiation vehicle control to which the relative expression ( $2^{-\Delta\Delta Ct}$ ) of each sample was calculated. The adjusted p-value was calculated by Dunn's or Dunnett's multiple comparison test to each control separately (gray bars), i.e. the differentiation vehicle control (\*) and the microRNA mimic negative control (miR-NC, #), as recommended following a parametric/non-parametric one-way ANOVA on all conditions: ns for non-significant, \*/# for  $p \leq 0.05$ , \*\*/###

for  $p \leq 0.01$ , \*\*\*/#### for  $p \leq 0.001$ , \*\*\*\*/##### for  $p \leq 0.0001$ . Data of 3 experiments with each condition in triplicate. OPC, oligodendrocyte progenitor cells; OL, oligodendrocytes; SD, standard deviation.

A

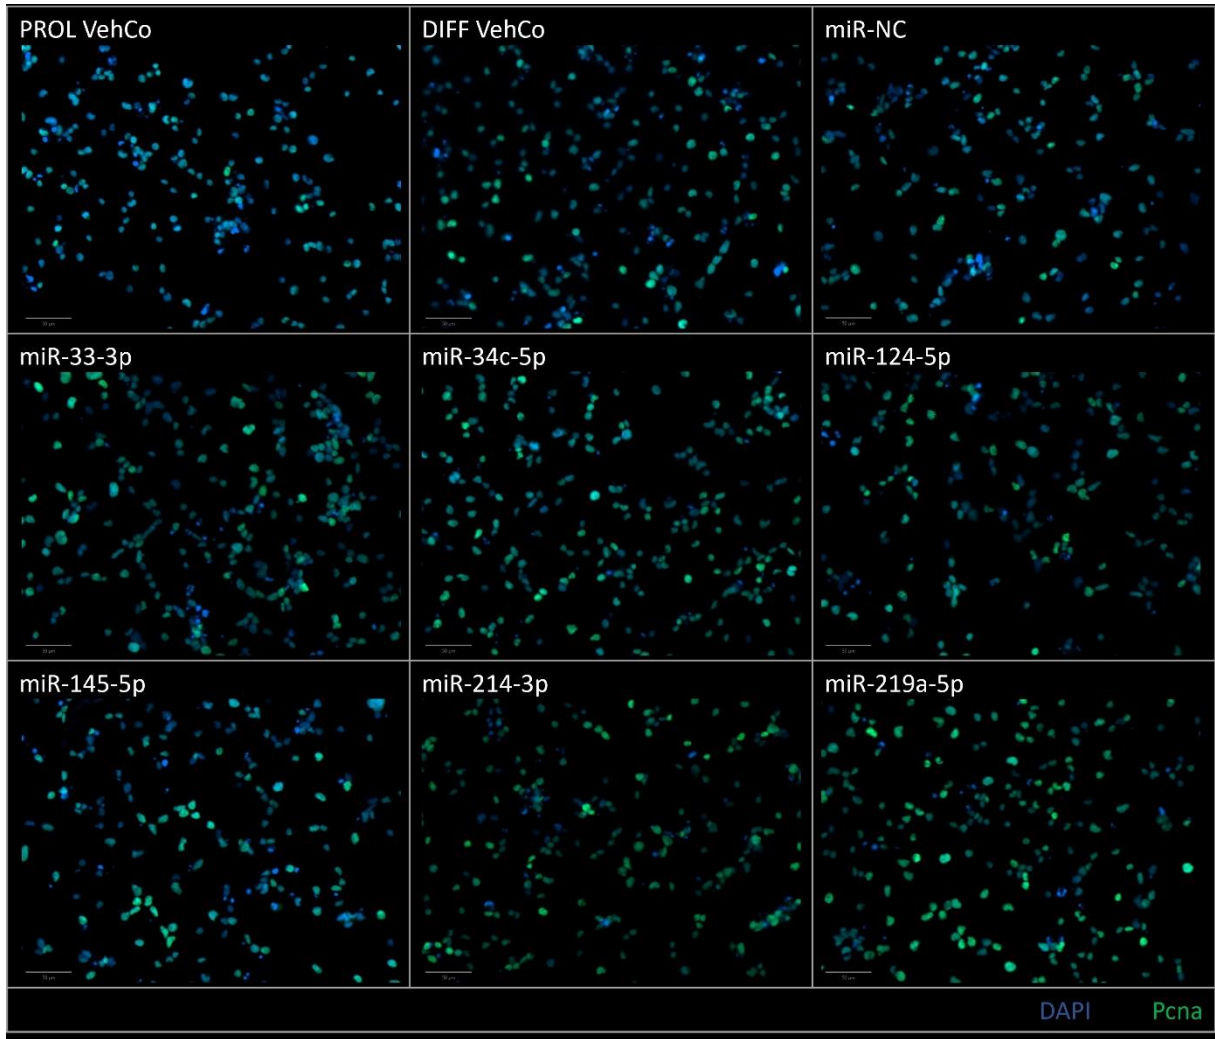

B

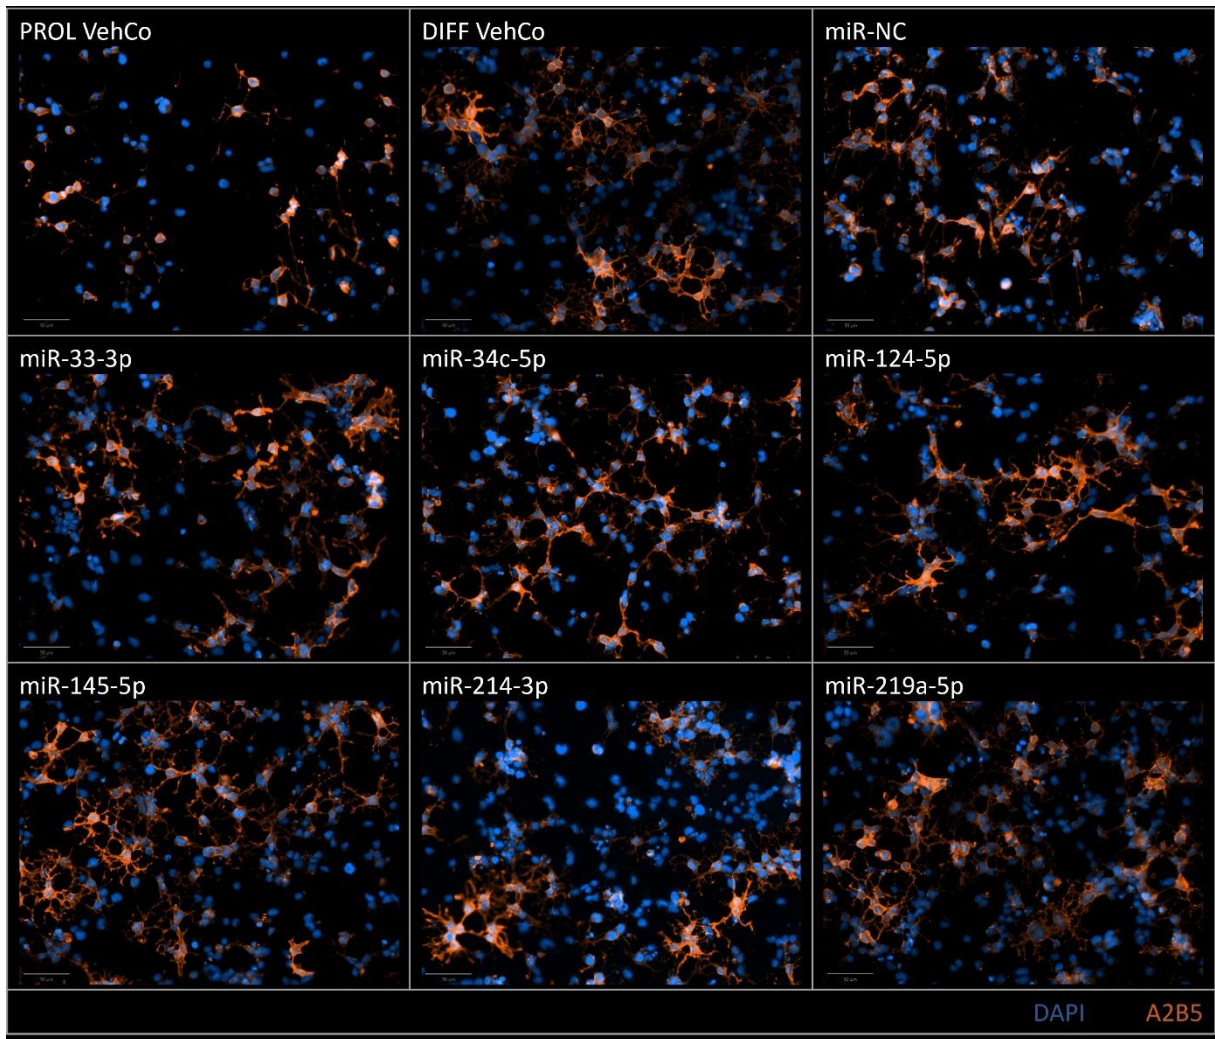

C

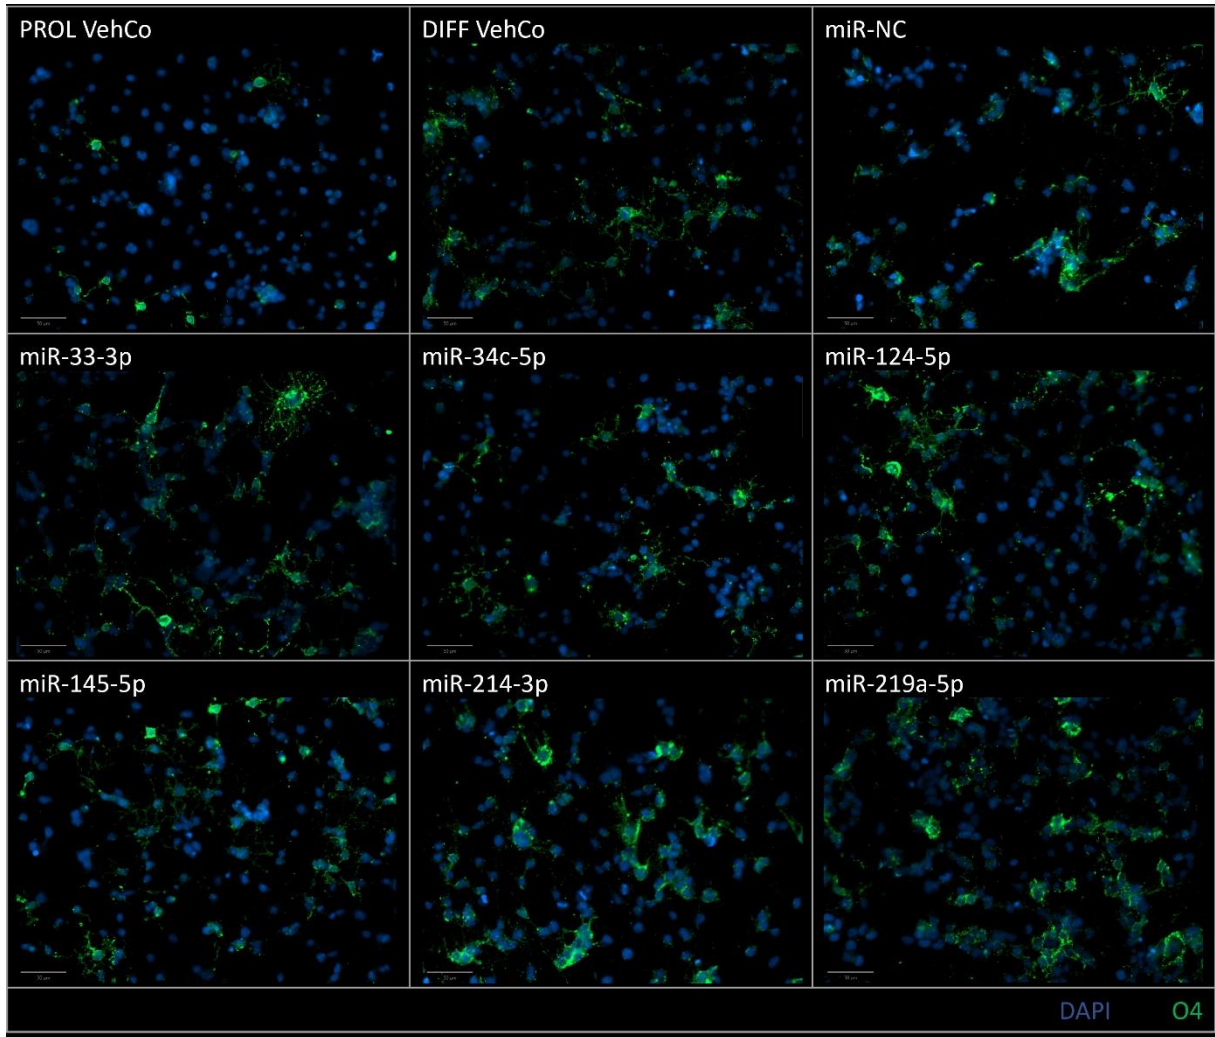



**D**
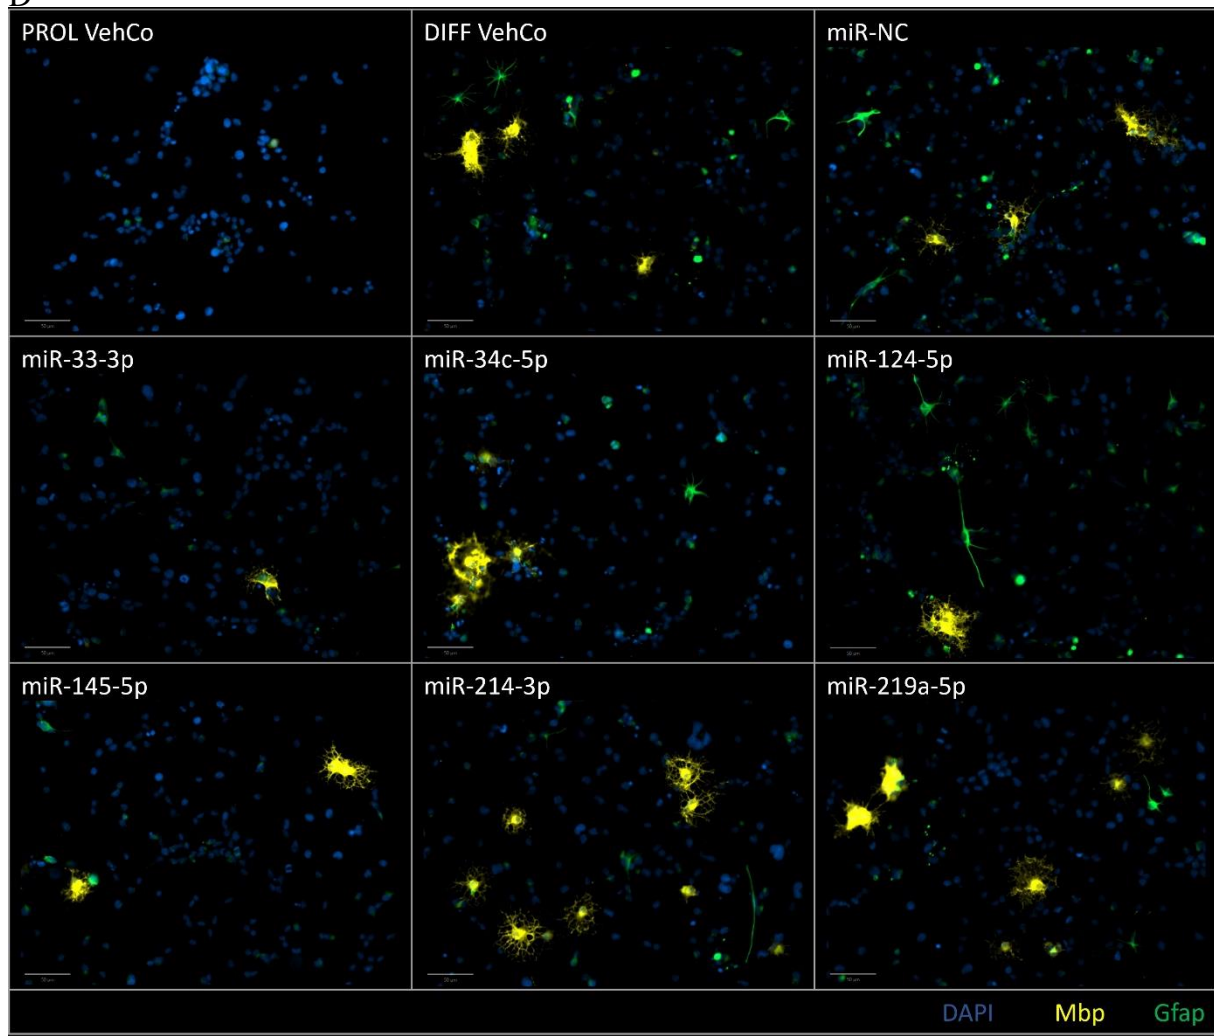

**Supplementary figure 3:** The effect of 5 microRNA mimics on the proliferation and differentiation of CG-4 cells in immunocytochemistry. These fluorescence micrographs are representative of the staining of (A) proliferation marker Pcna (green), (B) OPC marker A2B5 (orange), (C) late progenitor/early differentiation marker O4 (green), and (D) mature oligodendrocyte marker Mbp (yellow) and astrocyte marker Gfap (green) in CG-4 cells following the single transfection of each microRNA mimic (as labelled in white) in differentiation culture conditions, alongside the proliferation and differentiation vehicle controls (PROL and DIFF VehCo). Of note, Mbp-staining suggests the branching morphology of mature oligodendrocytes. All cell nuclei were counterstained with DAPI (blue). Scale bars = 50  $\mu$ m. OPC, oligodendrocyte progenitor cells; miR-NC, microRNA negative control.

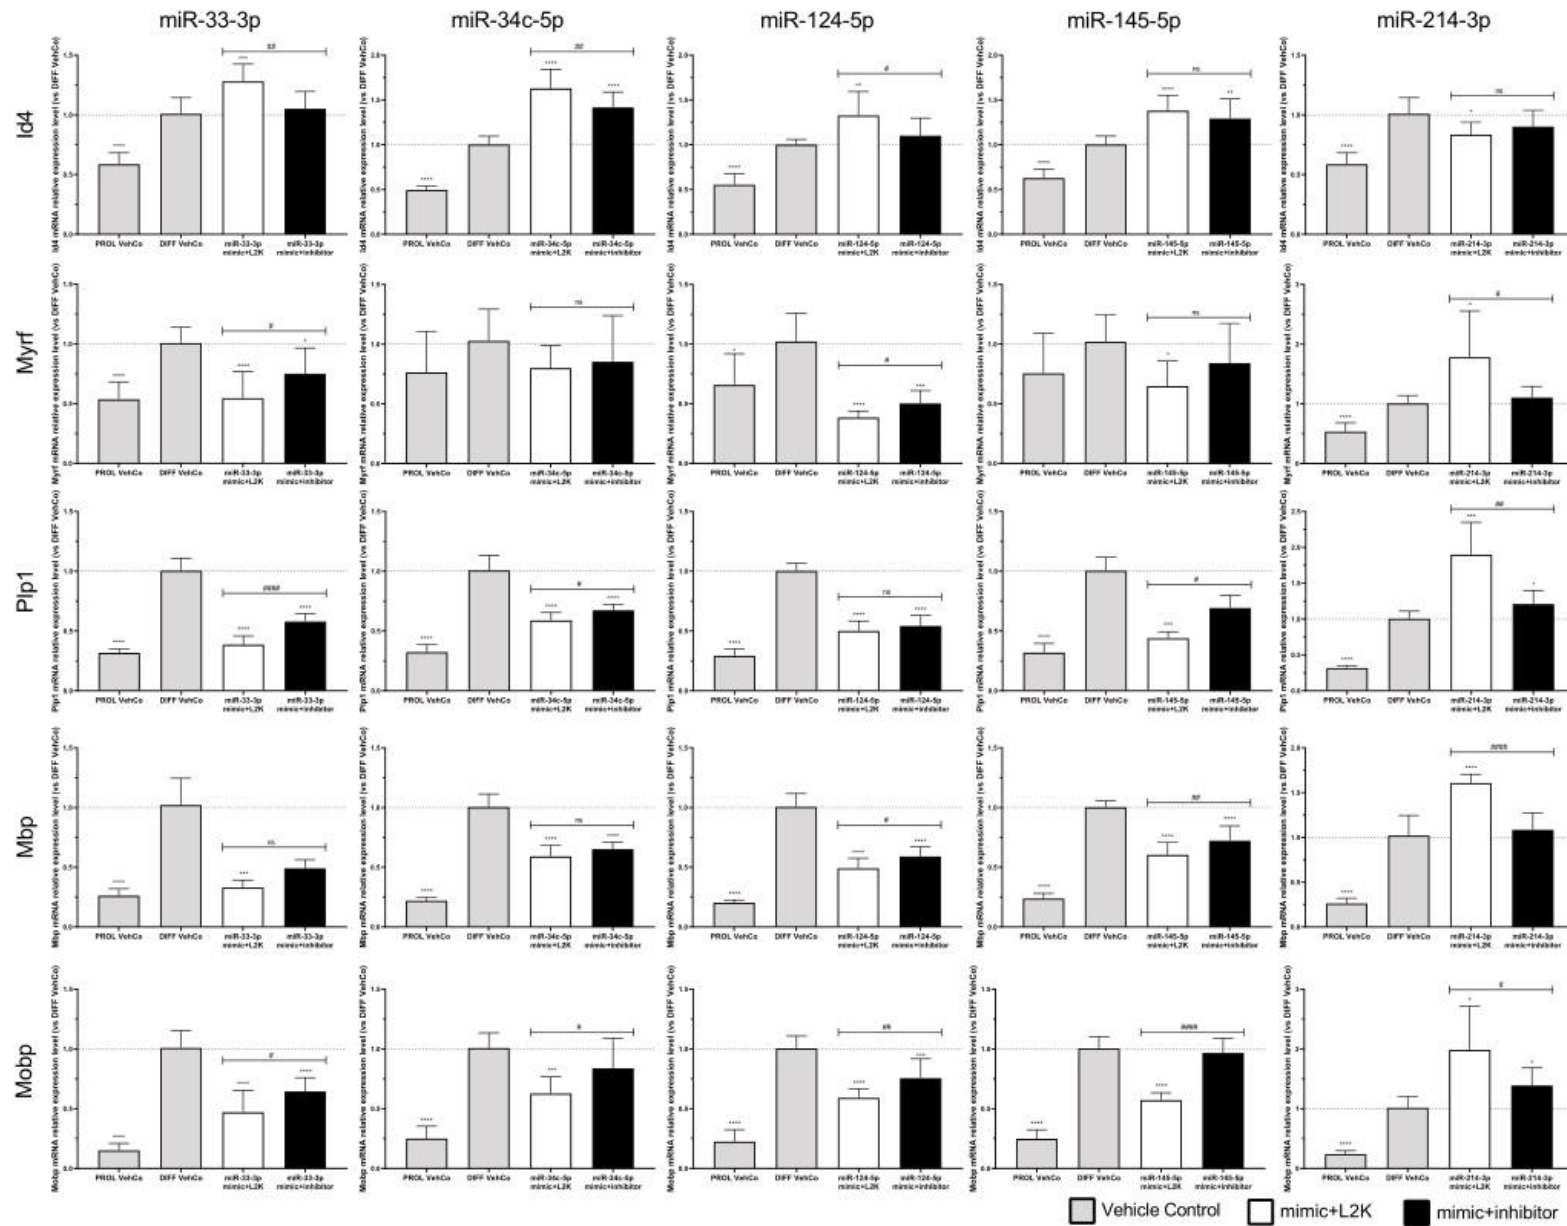

**Supplementary figure 4:** The effect of 5 microRNA mimics and their inhibitors on the differentiation of CG-4 cells in RT-qPCR. The plots show the relative expression (mean with SD of  $2^{-\Delta\Delta C_t}$ ) of the OPC marker (*Id4*) and OL markers (*Myrf*, *Plp1*, *Mbp*, and *Mobp*) to the differentiation vehicle control (DIFF VehCo, gray bar), resulting from the sequential transfection of each microRNA mimic followed (black bar) or not (white bar) by its inhibitor (as labelled on the *x*-axis) in CG-4 cells in differentiation culture conditions, as well as the proliferation vehicle control (PROL VehCo, gray bar). The dotted line represents the mean relative expression of the differentiation vehicle control to which the relative expression ( $2^{-\Delta\Delta C_t}$ ) of each sample was calculated. The adjusted p-value was calculated by Dunn's or Dunnett's multiple comparison test to the differentiation vehicle control (\*) and by Sidak's, Tamhane's T2 or Dunn's multiple comparison test between the microRNA mimic and its inhibitor (#), as recommended following a parametric/non-parametric one-way ANOVA on all conditions: ns for non-significant, \*/# for  $p \leq 0.05$ , \*\*/## for  $p \leq 0.01$ , \*\*\*/### for  $p \leq 0.001$ , \*\*\*\*/#### for  $p \leq 0.0001$ . Data of 3 experiments for each microRNA with each condition in triplicate. L2K, Lipofectamine™ 2000; SD, standard deviation.

A

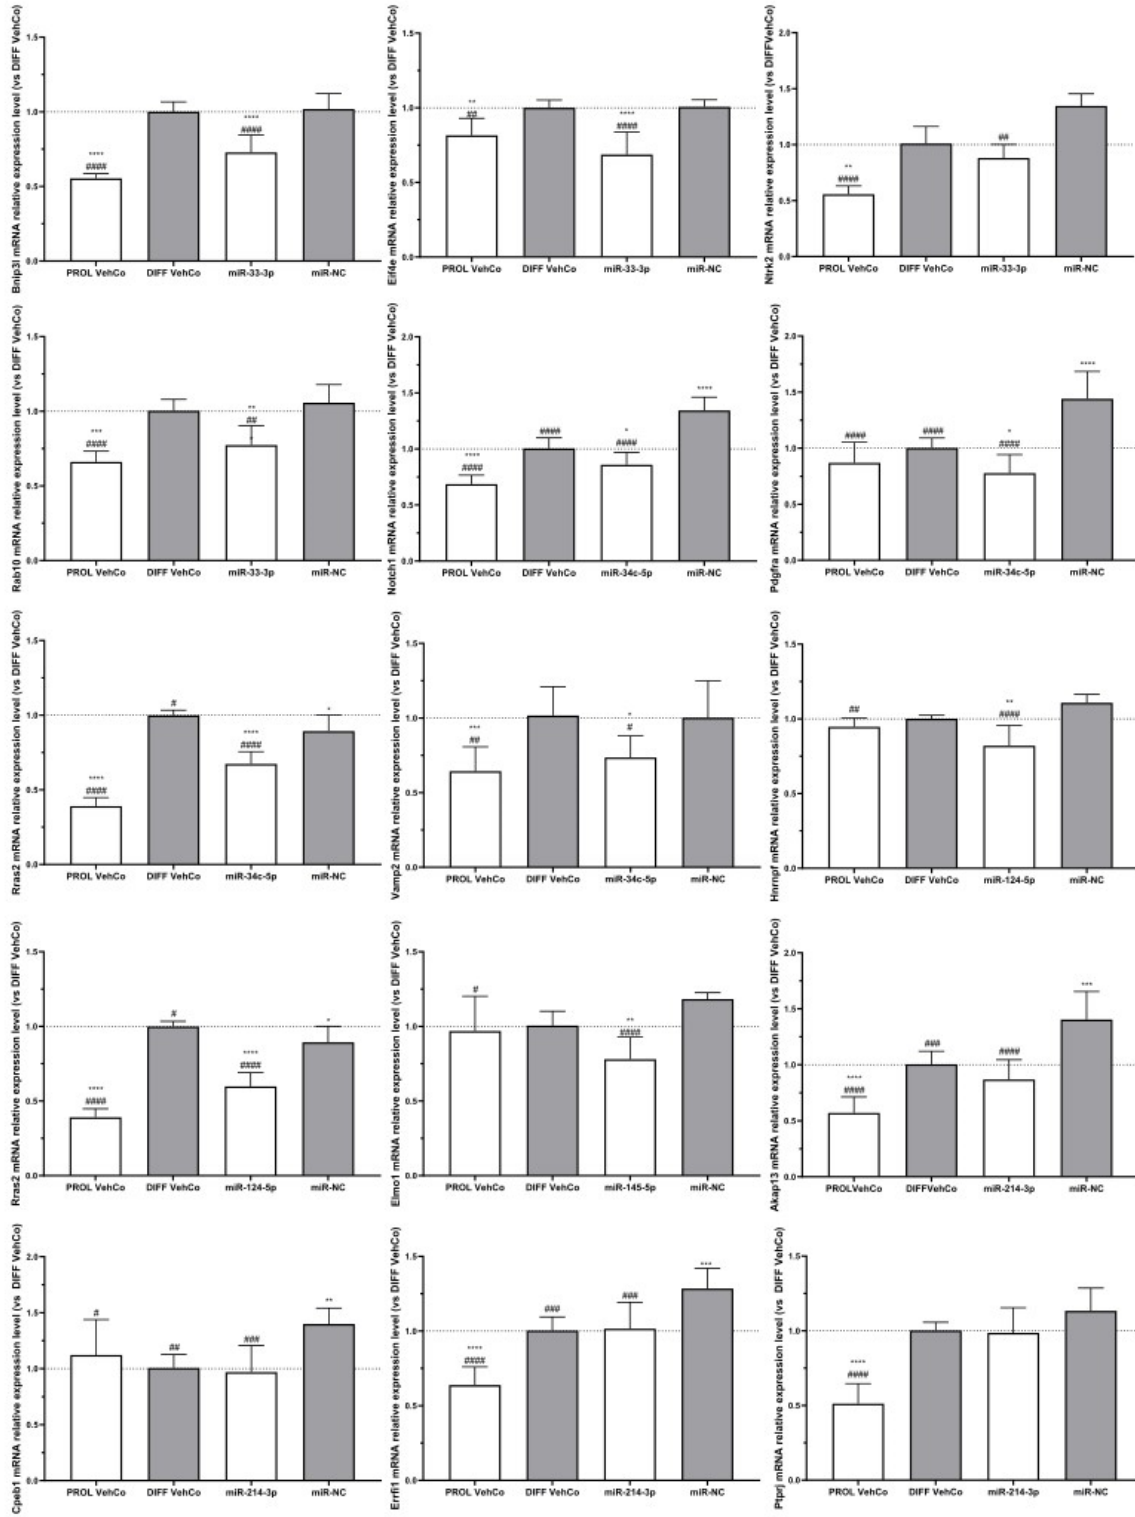

B

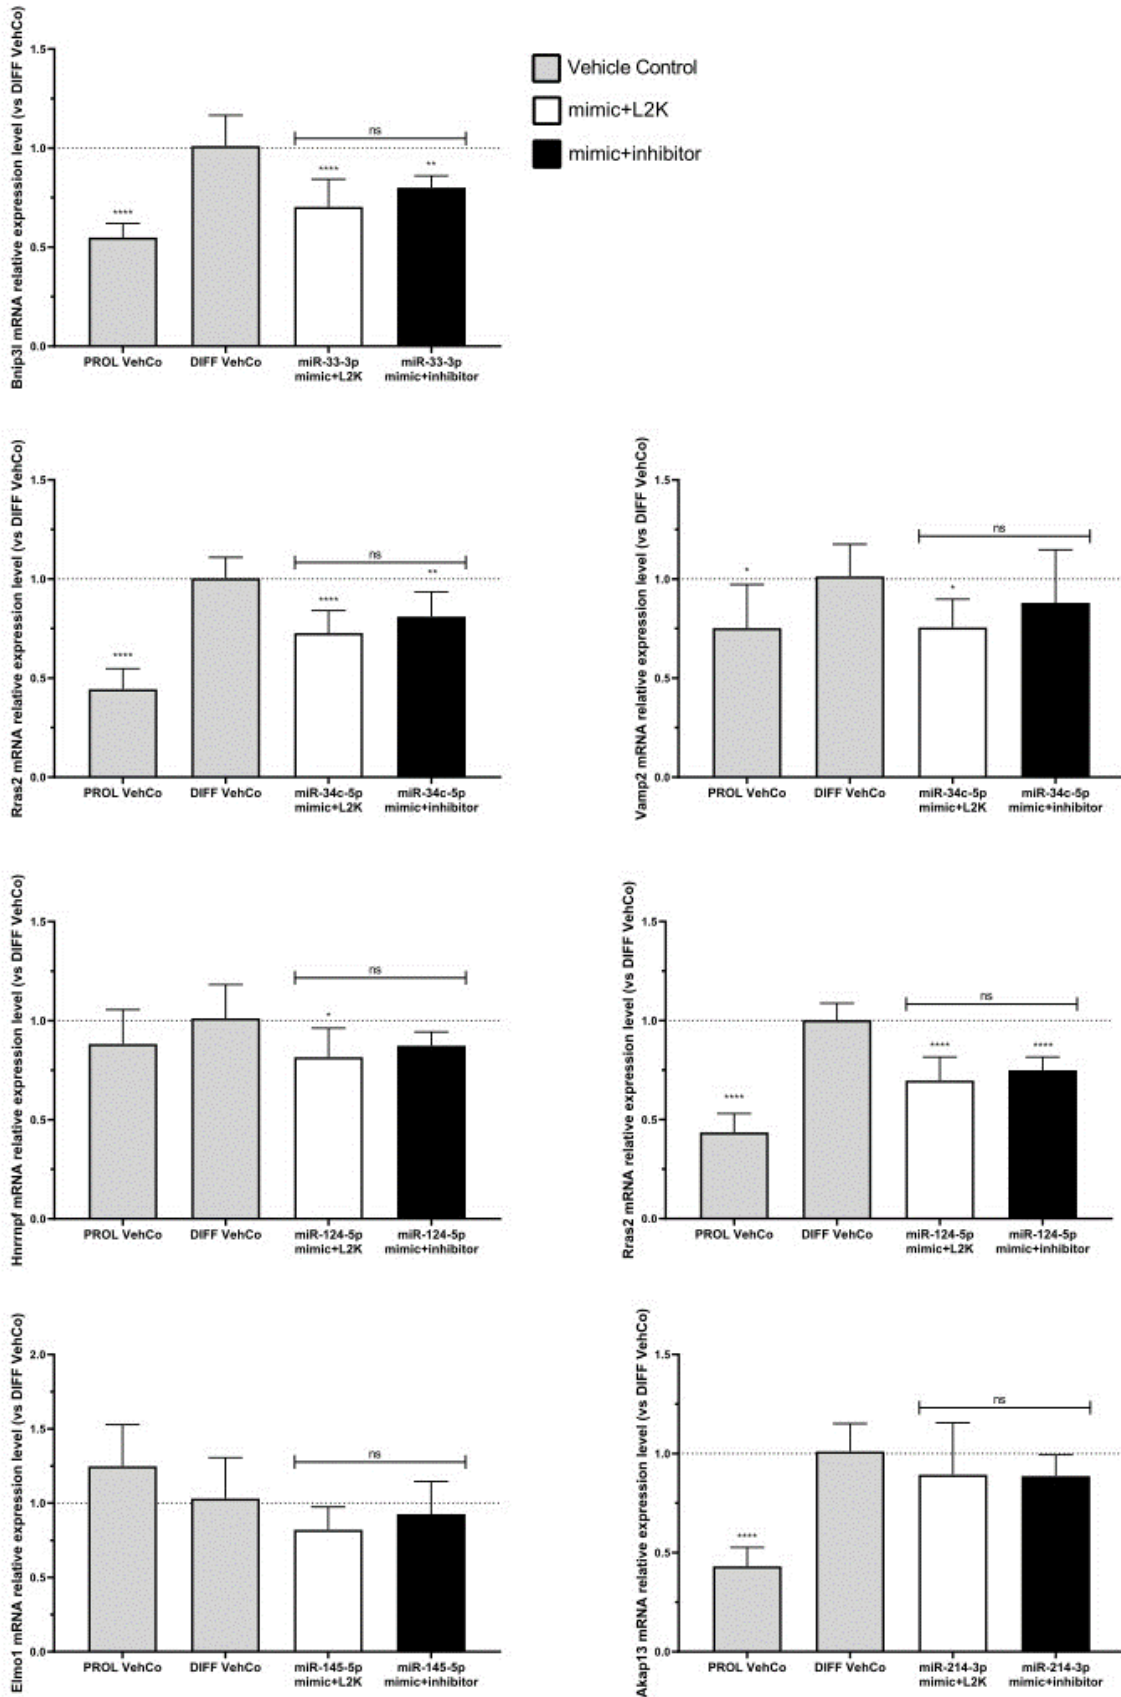

**Supplementary figure 5:** Potential mRNA targets of each microRNA verified in RT-qPCR by (A) the microRNA mimic and (B) the microRNA mimic and its inhibitor. The plots show the relative expression (mean with SD of  $2^{-\Delta\Delta C_t}$ ) of the potential mRNA targets of each microRNA to the differentiation vehicle control (DIFF VehCo, gray bar), resulting (A) from the single transfection of each microRNA mimic, or (B) from the sequential transfection of each microRNA mimic followed (black bar) or not (white bar) by its inhibitor (as labelled on the x-axis) in CG-4 cells in differentiation culture conditions, as well as the proliferation vehicle control (PROL VehCo). The dotted line represents the mean relative expression of the differentiation vehicle control to which the relative expression ( $2^{-\Delta\Delta C_t}$ ) of each sample was calculated. The adjusted p-value was calculated (A) by Dunn's or Dunnett's multiple comparison test to the differentiation vehicle control (\*) and to the microRNA negative control mimic (miR-NC, #), and (B) by Dunnett's multiple comparison test to the differentiation vehicle control (\*) and by Sidak's or Tamhane's T2 multiple comparison test between the microRNA mimic and its inhibitor (#), as recommended following a parametric/non-parametric one-way ANOVA on all conditions: ns for non-significant, \*/# for  $p \leq 0.05$ , \*\*/## for  $p \leq 0.01$ , \*\*\*/### for  $p \leq 0.001$ , \*\*\*\*/#### for  $p \leq 0.0001$ . Data of 3 experiments for each microRNA with each condition in triplicate. L2K, Lipofectamine<sup>TM</sup> 2000; SD, standard deviation.

A

| mRNA       | Forward primer - sequence 5'-3' | Reverse primer - sequence 5'-3' |
|------------|---------------------------------|---------------------------------|
| rno_Akap13 | TGCAGAAATGAACCAGCGGA            | GGGACACCAGCTCATACTTCT           |
| rno_Bnip3l | TGTCTCACTTAGTCGAGCCGC           | CTCCACCCAGGAACTGTTGA            |
| rno_Cnp    | GAGCTTCGACACTTCATTTCTGG         | TGGCCTTCCCGTAGTCACAG            |
| rno_Cpeb1  | CTCTGGAAGAAGAATCAGGAAGGA        | CCAGTGAATCATCCAAAATGGCA         |
| rno_Eif4e  | AGATGGCGACTGTGGAACCG            | CCAGAGTGCCACCTGTTCT             |
| rno_Elmo1  | TGATGAGAGGAGACAGGAGATGG         | GTGCTCGGATGACATGGGTTA           |
| rno_Errfi1 | GGGGCAGTCGCAATGAGTT             | AGAAGCACATCCGAGGGTTG            |
| rno_Gfap   | GGGATGGCGAGGTCATTAAG            | TCTGAGGAGGGAGCTTTAGG            |
| rno_Grb2   | TCTCCCTGTCAGTCAAGTTTGG          | CTTCACCACCCACAGGAAGTAC          |
| rno_Hnrnpf | GCATCTGTGGTGGTTCTTTAAGC         | ATTGAGCAGGACCAGGGTAG            |
| rno_Hprt1  | GTCATGTCGACCCTCAGTCC            | GCAAGTCTTTCAGTCCTGTCC           |
| rno_Id4    | CGTTGTGACAAGCGAACTGT            | AAAAGTTCCCCGCCCTGTTA            |
| rno_Mbp    | GTGGGGGTAAGAGAAACGCA            | CGAACACTCCTGTGGAACGA            |
| rno_Mobp   | CAGAGCACTTCAGCATCCACT           | CTCCTCCTTCTCAATCTGGTCTTC        |
| rno_Myrf   | TGCCAACAAACATGCGGAAGAAG         | GGGTTAGAGGCCCGAACAAATGA         |
| rno_Ng2    | AGGCCCTCAGGGGAATAGAC            | CAGGGCTCCTCTGTGTGAGA            |
| rno_Notch1 | TGCGTGGACAAGATCAACGA            | GGTCCCCGTGTAACCTTCTG            |
| rno_Ntrk2  | CGGGAGCATCTCTCGGTCTA            | CCTTTCATGCCAAACTTGGAATG         |
| rno_Olig2  | TCAAATCGAATTCACATTCGGAAG        | CGTGGATGAGGACACGGTTC            |
| rno_Pdgfra | TCTTATGGCGTTCTGCTCTG            | CCATCCTGTATCCGCTCTTG            |
| rno_Plp1   | GGCGACTACAAGACCACCAT            | AATGACACACCCGCTCCAAA            |
| rno_Ptprj  | CCAAGTTAATCCGAGTGGAGA           | TCCAATCAGCTTCAGATCCTCA          |
| rno_Rab10  | GAAAGGCAAAGGAGAGCAGATTG         | TCAGCTAATGTGAGGAACGCC           |
| rno_Rras2  | GACCATCAGAGACAGGTAACGC          | AACTCGGACAAGTTCGTGGAA           |
| rno_Sox10  | AGGTTGCTGAACGAGAGTGAC           | CGCCGAGGTTGGTACTTGTAG           |
| rno_Tcf7l2 | ATGGTTAGTACCACAGCAAGGT          | AGAGTGTGATGGGGAGGGAC            |
| rno_Vamp2  | CCCTGCACCTCCTCCAAATC            | GATGTCCACCACCTCATCCAC           |

B

| miRCURY LNA miRNA<br>(Qiagen) | Mimic (Cat No. 339173) | Inhibitor (Cat. No. 339121) | PCR Assay (Cat. No. 339306) |                          | miRBase      |
|-------------------------------|------------------------|-----------------------------|-----------------------------|--------------------------|--------------|
| microRNA ID                   |                        | GeneGlobe ID                |                             | sequence 5'-3'           | MIMAT ID     |
| hsa-miR-15a-3p                | YM00471094             | NA                          | NA                          | CAGGCCAUAUUGUGCUGCCUCA   | MIMAT0004488 |
| hsa-miR-20a-5p                | YM00472205             | NA                          | NA                          | UAAAGUGCUUAUAGUGCAGGUAG  | MIMAT0000075 |
| hsa-miR-29c-3p                | YM00470481             | NA                          | NA                          | UAGCACCAUUUGAAAUCGGUUA   | MIMAT0000681 |
| rno-miR-33-3p                 | YM00471597             | YI04100217                  | YP02113481                  | CAAUGUUUCCACAGUGCAUCA    | MIMAT0017104 |
| hsa-miR-34a-5p                | YM00473212             | NA                          | NA                          | UGGCAGUGUCUUAGCUGGUUGU   | MIMAT0000255 |
| hsa-miR-34c-5p                | YM00472810             | YI04101981                  | YP00205659                  | AGGCAGUGUAGUUAGCUGAUUGC  | MIMAT0000686 |
| hsa-miR-103a-3p               | NA                     | NA                          | YP00204063                  | AGCAGCAUUGUACAGGGCUAUGA  | MIMAT0000101 |
| hsa-miR-124-5p                | YM00470547             | YI04101111                  | YP00204266                  | CGUGUUCACAGCGGACCUUGAU   | MIMAT0004591 |
| hsa-miR-145-5p                | YM00470014             | YI04102423                  | YP00204483                  | GUCCAGUUUCCCAGGAAUCCCU   | MIMAT0000437 |
| hsa-miR-146a-5p               | YM00472124             | NA                          | NA                          | UGAGAACUGAAUCCAUGGGUU    | MIMAT0000449 |
| mmu-miR-155-5p                | YM00470919             | NA                          | NA                          | UUA AUGCUAAUUGUGAUAGGGGU | MIMAT0000165 |
| hsa-miR-181c-5p               | YM00471280             | NA                          | NA                          | AACAUUCAACCUGUCGGUGAGU   | MIMAT0000258 |
| rno-miR-214-3p                | YM00472862             | YI04105003                  | YP00205512                  | ACAGCAGGCACAGACAGGCAG    | MIMAT0000885 |
| hsa-miR-219a-5p               | YM00470876             | NA                          | NA                          | UGAUUGUCCAAACGCAAUUCU    | MIMAT0000276 |
| rno-miR-297                   | YM00470075             | NA                          | NA                          | AUGUAUGUGUGCAUGUAUGCAUG  | MIMAT0000899 |
| Negative Control              | YM00479902             | NA                          | NA                          | UCACCGGGUGUAAAUCAGCUUG   | NA           |



**Supplementary table 1:** Sequences of mRNA primers, microRNA mimics and microRNA primers. (A) List of forward and reverse primers of the investigated mRNAs. (B) List of microRNA mimics, inhibitors, and PCR Assay primers (miRCURY LNA miRNA, Qiagen) with corresponding GeneGlobe ID (Qiagen database), sequence and MIMAT ID (miRbase database). Interspecies compatibility was strictly verified. hsa, *Homo sapiens*; mmu, *Mus musculus*; rno, *Rattus norvegicus*; NA, not applicable.

A

| mRNA                      | vs. DIFF VehCo |          | vs. miR-NC |          |
|---------------------------|----------------|----------|------------|----------|
|                           | padj           | Log2(FC) | padj       | Log2(FC) |
| <b>miR-33-3p targets</b>  |                |          |            |          |
| Ntrk2                     | 2.41E-08       | -0.18    | 2.73E-14   | -0.34    |
| Rab10                     | 4.28E-05       | -0.15    | 2.96E-06   | -0.19    |
| Eif4e                     | 5.57E-21       | -0.36    | 6.28E-06   | -0.25    |
| Bnip3l                    | 3.78E-10       | -0.22    | 1.96E-05   | -0.18    |
| Stim2                     | 1.69E-02       | -0.14    | 4.45E-03   | -0.20    |
| Fam168b                   | 5.15E-03       | -0.10    | 2.11E-03   | -0.13    |
| Sec63                     | 1.37E-08       | -0.23    | 1.25E-12   | -0.34    |
| <b>miR-34c-5p targets</b> |                |          |            |          |
| Vamp2*                    | 5.08E-28       | -0.43    | 8.74E-17   | -0.38    |
| Vdr*                      | 1.05E-24       | -0.59    | 6.85E-13   | -0.53    |
| Rras2*                    | 1.23E-03       | -0.30    | ns         |          |
| <b>miR-124-5p targets</b> |                |          |            |          |
| Rras2*                    | 8.31E-16       | -0.67    | 2.93E-02   | -0.28    |
| Cdon*                     | 5.43E-07       | -0.55    | 1.86E-05   | -0.60    |
| Hnrnpab*                  | 1.76E-28       | -0.44    | 2.57E-21   | -0.50    |
| Hnrnpf                    | 1.91E-04       | -0.11    | 2.24E-02   | -0.10    |
| <b>miR-145-5p targets</b> |                |          |            |          |
| Myrf                      | 2.96E-76       | -0.77    | 6.53E-32   | -0.56    |
| Snx27                     | 4.45E-09       | -0.22    | 1.59E-03   | -0.18    |
| <b>miR-214-3p targets</b> |                |          |            |          |
| Id4 <sup>+</sup>          | 3.05E-04       | -0.28    | 1.24E-06   | -0.50    |
| Errfi1                    | 2.71E-04       | -0.26    | 1.17E-05   | -0.37    |
| Grb2*                     | 1.19E-04       | -0.14    | 7.59E-06   | -0.22    |
| Fgfr1 <sup>+</sup>        | 3.10E-06       | -0.15    | 9.30E-11   | -0.28    |

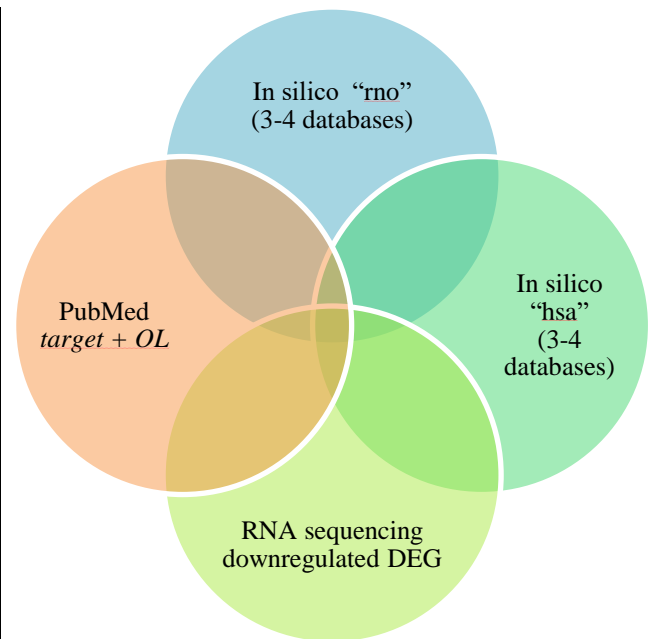

B

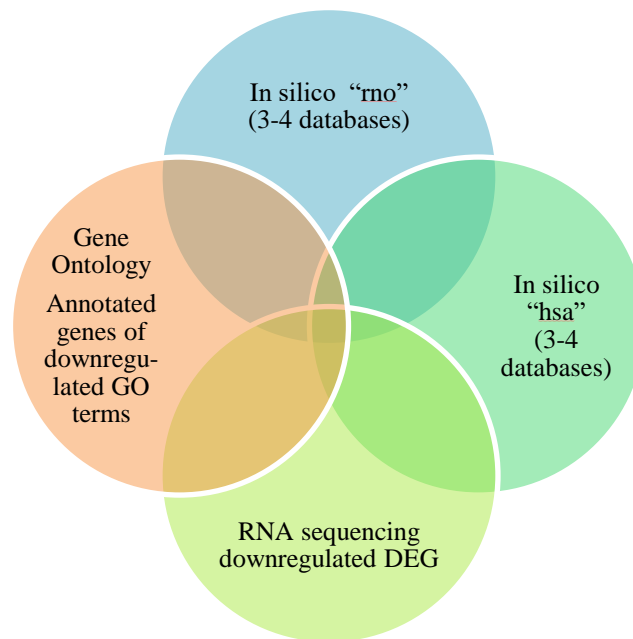

|                           | vs. DIFF VehCo |          | vs. miR-NC |          | Gene Ontology term (Biological Process)                                          |
|---------------------------|----------------|----------|------------|----------|----------------------------------------------------------------------------------|
| mRNA                      | padj           | Log2(FC) | padj       | Log2(FC) |                                                                                  |
| <b>miR-33-3p targets</b>  |                |          |            |          |                                                                                  |
| Calm2                     | 4.68E-07       | -0.16    | 1.36E-02   | -0.11    | cell division                                                                    |
| Etnk1                     | 4.15E-02       | -0.08    | 4.01E-02   | -0.11    | phospholipid biosynthetic process                                                |
| Far1                      | 2.67E-21       | -0.40    | 6.05E-12   | -0.40    | phospholipid biosynthetic process<br>long-chain fatty-acyl-CoA metabolic process |
| Ndel1                     | 2.75E-04       | -0.19    | 4.09E-03   | -0.20    | chromosome segregation                                                           |
| Ntrk2                     | 2.41E-08       | -0.18    | 2.73E-14   | -0.34    | myelination<br>axon ensheathment                                                 |
| Rab10                     | 4.28E-05       | -0.15    | 2.96E-06   | -0.19    | cell division                                                                    |
| Slc1a3                    | 1.51E-02       | -0.12    | 3.91E-13   | -0.41    | generation of precursor metabolites and energy                                   |
| Ube2j1                    | 2.79E-02       | -0.13    | 6.40E-05   | -0.27    | regulation of protein catabolic process                                          |
| Ube2n                     | 8.00E-30       | -0.46    | 1.32E-10   | -0.35    | DNA repair                                                                       |
| <b>miR-34c-5p targets</b> |                |          |            |          |                                                                                  |
| Ago4                      | 4.62E-07       | -0.46    | 2.69E-04   | -0.44    | ribonucleoprotein complex assembly                                               |
| Atg4b                     | 3.59E-03       | -0.13    | 2.92E-02   | -0.13    | regulation of protein catabolic process                                          |
| Dixdc1                    | 7.73E-03       | -0.14    | 5.39E-03   | -0.17    | Wnt signaling pathway<br>stress-activated MAPK cascade<br>axonogenesis           |

|                           |          |       |          |       |                                                                                                                                                                                |
|---------------------------|----------|-------|----------|-------|--------------------------------------------------------------------------------------------------------------------------------------------------------------------------------|
| Dll1                      | 3.24E-04 | -0.29 | 5.77E-10 | -0.54 | astrocyte differentiation<br>glial cell differentiation                                                                                                                        |
| Erc1                      | 1.09E-21 | -0.31 | 4.33E-02 | -0.11 | synapse organization                                                                                                                                                           |
| Erlin1                    |          |       |          |       | regulation of lipid biosynthetic process<br>cholesterol metabolic process                                                                                                      |
| Map1a                     | 6.31E-13 | -0.23 | 6.03E-05 | -0.16 | regulation of protein catabolic process<br>axonogenesis                                                                                                                        |
| Notch1                    | 1.54E-28 | -0.32 | 6.11E-21 | -0.34 | Wnt signaling pathway<br>Ras protein signal transduction<br>astrocyte differentiation<br>oligodendrocyte differentiation<br>negative regulation of gliogenesis<br>axonogenesis |
| Pdgfra                    | 7.60E-47 | -0.34 | 7.92E-60 | -0.50 | positive regulation of kinase activity<br>regulation of phospholipid metabolic process                                                                                         |
| Pip5k1a                   | 1.16E-09 | -0.26 | 7.49E-08 | -0.29 | glycerolipid biosynthetic process                                                                                                                                              |
| Ppp2r5a                   | 8.38E-06 | -0.23 | 9.80E-05 | -0.29 | regulation of lipid metabolic process                                                                                                                                          |
| Synj1                     | 1.67E-02 | -0.14 | 6.32E-04 | -0.22 | regulation of gliogenesis                                                                                                                                                      |
| Vcl                       | 2.86E-06 | -0.37 | 4.27E-07 | -0.47 | axonogenesis                                                                                                                                                                   |
| <b>miR-124-5p targets</b> |          |       |          |       |                                                                                                                                                                                |
| Atxn2                     | 1.42E-04 | -0.17 | 5.32E-03 | -0.17 | ribonucleoprotein complex biogenesis                                                                                                                                           |
| Hnrnpf                    | 1.91E-04 | -0.11 | 2.24E-02 | -0.10 | mRNA processing<br>RNA splicing                                                                                                                                                |
| <b>miR-145-5p targets</b> |          |       |          |       |                                                                                                                                                                                |
| Adpgk                     | 1.75E-02 | -0.15 | 2.49E-02 | -0.17 | pyruvate metabolic process                                                                                                                                                     |
| Arl6ip5                   | 7.97E-06 | -0.19 | 9.17E-03 | -0.15 | stress-activated protein kinase signaling cascade                                                                                                                              |
| Elmo1                     | 2.10E-06 | -0.29 | 5.30E-09 | -0.40 | Ras protein signal transduction                                                                                                                                                |
| Map4k4                    | 3.37E-13 | -0.20 | 5.96E-03 | -0.13 | Ras protein signal transduction<br>stress-activated protein kinase signaling cascade                                                                                           |
| Myrf                      | 2.96E-76 | -0.77 | 6.53E-32 | -0.56 | oligodendrocyte differentiation<br>gliogenesis<br>myelination<br>axon ensheathment                                                                                             |
| Rtkn                      | 7.52E-16 | -0.35 | 3.17E-14 | -0.42 | Ras protein signal transduction<br>Rho protein signal transduction<br>cell division                                                                                            |
| <b>miR-214-3p targets</b> |          |       |          |       |                                                                                                                                                                                |
| Akap13                    | 4.54E-26 | -0.35 | 9.44E-30 | -0.49 | positive regulation of kinase activity                                                                                                                                         |
| Atg13                     | 1.97E-03 | -0.18 | 2.81E-02 | -0.17 | autophagy                                                                                                                                                                      |
| Atp2a2                    | 1.25E-56 | -0.41 | 9.92E-28 | -0.38 | autophagy                                                                                                                                                                      |

|        |          |       |          |       |                                                                                                                                                                                 |
|--------|----------|-------|----------|-------|---------------------------------------------------------------------------------------------------------------------------------------------------------------------------------|
| Cdip1  | 2.05E-06 | -0.23 | 2.09E-02 | -0.16 | intrinsic apoptotic signaling pathway                                                                                                                                           |
| Cpeb1  | 3.74E-03 | -0.83 | 6.65E-04 | -1.13 | cytoplasmic translation                                                                                                                                                         |
| Csf1   | 3.21E-03 | -0.26 | 5.09E-06 | -0.45 | positive regulation of kinase activity<br>gliogenesis                                                                                                                           |
| Errfi1 | 2.71E-04 | -0.26 | 1.17E-05 | -0.37 | response to platelet-derived growth factor<br>negative regulation of ERBB signaling pathway                                                                                     |
| Gpd1   | 2.23E-14 | -1.10 | 1.72E-17 | -1.35 | glycerolipid metabolic process<br>generation of precursor metabolites and energy<br>pyruvate biosynthetic process<br>carbohydrate catabolic process<br>ATP biosynthetic process |
| Ifnar1 | 1.18E-08 | -0.23 | 4.03E-11 | -0.32 | generation of precursor metabolites and energy                                                                                                                                  |
| Mtmr3  | 6.38E-03 | -0.11 | 2.89E-02 | -0.12 | phospholipid metabolic process<br>glycerolipid metabolic process<br>autophagy                                                                                                   |
| Mtmr4  | 5.09E-03 | -0.13 | 1.23E-02 | -0.15 | phospholipid metabolic process<br>glycerolipid metabolic process<br>autophagy                                                                                                   |
| Plec   | 1.18E-26 | -0.38 | 8.89E-08 | -0.26 | glial cell differentiation<br>myelin maintenance<br>generation of precursor metabolites and energy                                                                              |
| Ptprj  | 3.88E-15 | -0.29 | 2.55E-17 | -0.39 | insulin receptor signaling pathway<br>negative regulation of ERBB signaling pathway<br>glial cell differentiation                                                               |

**Supplementary table 2:** Potential mRNA targets of each microRNA. The potential mRNA targets were predicted by *in silico* analysis, by their downregulation in RNA sequencing and by (A) a Pubmed search of their involvement in OPC/OL physiology or (B) the gene annotation to downregulated Gene Ontology terms of interest as illustrated by the Venn diagrams. We selected the targets predicted by 3-4 databases in both rats and humans, except for (\*) only in rats and (+) only in humans and predicted by 0-2 databases in the other species. Each table contains the fold change (FC, expressed as logarithm base 2 [Log<sub>2</sub>(FC)] of the gene expression value of the potential mRNA targets to the differentiation vehicle control (DIFF VehCo) and to the microRNA negative control mimic (miR-NC), highlighted by a blue-color gradient [dark blue for a bigger negative fold change, to light blue for a smaller negative fold change]), as well as the adjusted p-value (padj) in RNA sequencing. DEG, differentially expressed genes; GO, Gene Ontology; hsa, *Homo sapiens*; ns, non-significant; OPC, oligodendrocyte progenitor cells; OL, oligodendrocytes; rno, *Rattus norvegicus*.

Furthermore, we will briefly highlight other targets we did not investigate, but that might deserve further attention, namely Fyn related Src family tyrosine kinase (*Frk*) and vitamin D receptor (*Vdr*) (miR-34c-5p), as well as fibroblast growth factor receptor 1 (*Fgfr1*) (miR-214-3p). *Frk* (miR-34c-5p) has not been described in OPCs, but it is related to Fyn tyrosine kinase. Fyn tyrosine kinase regulates morphological OPC differentiation by activation of Rac1 and inactivation of RhoA, involved in stress fiber formation and actin polymerization, and allows *Mbp* translation in RNA transport granules by phosphorylating Hnrnpa2/Hnrnpf (Liang et al., 2004; White et al., 2012; Pedraza et al., 2014) *Vdr* (miR-34c-5p) was only predicted by one database in humans. However, vitamin D treatment, both *in vitro* and *in vivo*, as well as *Vdr* signaling induce OPC differentiation (de la Fuente et al., 2015; Gomez-Pinedo et al., 2020; Mengozzi et al., 2020; Li et al., 2022). Herein, vitamin D inhibits OPC proliferation by downregulating Myc proto-oncogene BHLH transcription factor, and upregulates Ras protein signal transduction, that has been linked to OPC differentiation (Mengozzi et al., 2020; Li et al., 2022). Finally, *Fgfr1*, a target of miR-214-3p predicted in humans but not in rats, is involved in OPC specification and proliferation (Baron et al., 2000; Furusho et al., 2011).

## References

- Baron, W., Metz, B., Bansal, R., Hoekstra, D., and de Vries, H. (2000). PDGF and FGF-2 Signaling in Oligodendrocyte Progenitor Cells: Regulation of Proliferation and Differentiation by Multiple Intracellular Signaling Pathways. *Molecular and Cellular Neuroscience* 15, 314–329. doi: 10.1006/mcne.1999.0827.
- de la Fuente, A. G., Errea, O., van Wijngaarden, P., Gonzalez, G. A., Kerninon, C., Jarjour, A. A., et al. (2015). Vitamin D receptor–retinoid X receptor heterodimer signaling regulates oligodendrocyte progenitor cell differentiation. *J Cell Biol* 211, 975–985. doi: 10.1083/jcb.201505119.
- Furusho, M., Kaga, Y., Ishii, A., Hébert, J. M., and Bansal, R. (2011). Fibroblast Growth Factor Signaling Is Required for the Generation of Oligodendrocyte Progenitors from the Embryonic Forebrain. *J. Neurosci.* 31, 5055–5066. doi: 10.1523/JNEUROSCI.4800-10.2011.
- Gomez-Pinedo, U., Cuevas, J. A., Benito-Martín, M. S., Moreno-Jiménez, L., Esteban-Garcia, N., Torre-Fuentes, L., et al. (2020). Vitamin D increases remyelination by promoting oligodendrocyte lineage differentiation. *Brain Behav* 10, e01498. doi: 10.1002/brb3.1498.
- Li, N., Yao, M., Liu, J., Zhu, Z., Lam, T.-L., Zhang, P., et al. (2022). Vitamin D Promotes Remyelination by Suppressing c-Myc and Inducing Oligodendrocyte Precursor Cell Differentiation after Traumatic Spinal Cord Injury. *Int J Biol Sci* 18, 5391–5404. doi: 10.7150/ijbs.73673.
- Liang, X., Draghi, N. A., and Resh, M. D. (2004). Signaling from integrins to Fyn to Rho family GTPases regulates morphologic differentiation of oligodendrocytes. *J Neurosci* 24, 7140–7149. doi: 10.1523/JNEUROSCI.5319-03.2004.

- Mengozi, M., Hesketh, A., Bucca, G., Ghezzi, P., and Smith, C. P. (2020). Vitamins D3 and D2 have marked but different global effects on gene expression in a rat oligodendrocyte precursor cell line. *Mol Med* 26, 32. doi: 10.1186/s10020-020-00153-7.
- Pedraza, C. E., Taylor, C., Pereira, A., Seng, M., Tham, C.-S., Izrael, M., et al. (2014). Induction of oligodendrocyte differentiation and in vitro myelination by inhibition of rho-associated kinase. *ASN Neuro* 6, 1759091414538134. doi: 10.1177/1759091414538134.
- White, R., Gonsior, C., Bauer, N. M., Krämer-Albers, E.-M., Luhmann, H. J., and Trotter, J. (2012). Heterogeneous Nuclear Ribonucleoprotein (hnRNP) F Is a Novel Component of Oligodendroglial RNA Transport Granules Contributing to Regulation of Myelin Basic Protein (MBP) Synthesis \*. *Journal of Biological Chemistry* 287, 1742–1754. doi: 10.1074/jbc.M111.235010.
